# Supplementary material for: Semiflexible Immunobrushes Induce Enhanced T Cell Activation and Expansion
Source: PubMed Central journal article supplement — ACS Appl Mater Interfaces. 2021 Apr 2;13(14):16007–18. doi: 10.1021/acsami.0c21994 (PMC8045021; doi:10.1021/acsami.0c21994), 2021-04-02
Supplement: am0c21994_si_001.pdf [file am0c21994_si_001.pdf]

# Supporting Information

## Semiflexible Immunobrushes Induce Enhanced T Cell Activation And Expansion

*Roel Hammink*<sup>a,b,‡,\*</sup>, *Jorieke Weiden*<sup>a,b,c,‡</sup>, *Dion Voerman*<sup>a,c, ‡</sup>, *Carlijn Popelier*<sup>a</sup>, *Loek Eggermont*<sup>a,c</sup>, *Marjolein Schluck*<sup>a,b,c</sup>, *Carl Figdor*<sup>a,b,c</sup>, *Martijn Verdoes*<sup>a,c,\*</sup>

a. Department of Tumor Immunology, Radboud Institute for Molecular Life Sciences, Radboud University Medical Center, Geert Grooteplein 26, 6525 GA Nijmegen, The Netherlands.

b. Division of Immunotherapy, Oncode Institute, Radboud University Medical Center, Nijmegen, Netherlands.

c. Institute for Chemical Immunology, Nijmegen, Netherlands.

‡ These authors contributed equally to this work.

\* Corresponding authors.

E-mail: [Roel.Hammink@radboudumc.nl](mailto:Roel.Hammink@radboudumc.nl), [Martijn.Verdoes@radboudumc.nl](mailto:Martijn.Verdoes@radboudumc.nl)

## Content

Figure S1: AFM analysis of PIC length

Table S1: Overview of all formulations used in this study

Figure S2: Comparison with soluble PIC

Figure S3: Influence of  $\alpha$ CD28/  $\alpha$ CD3 ratio and density on proliferation

Figure S4: CD69 and CD25 expression of stimulated T cells

Figure S5: Proliferation of expanded T cells

Figure S6: Viability of expanded T cells

Figure S7: Gating strategy to determine T cell differentiation

Figure S8: Gating strategy to determine the T cell cytotoxicity

Figure S9: Gating strategy for to determine T cell exhaustion

Figure S10: Gating strategy to determine the intracellular cytokine production of T cells

Figure S11: Detailed overview of intracellular cytokine production

**a**

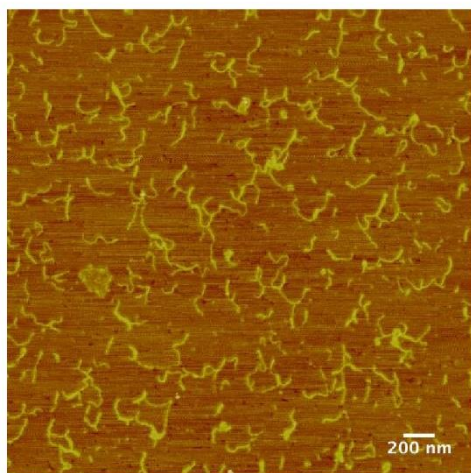

**b**

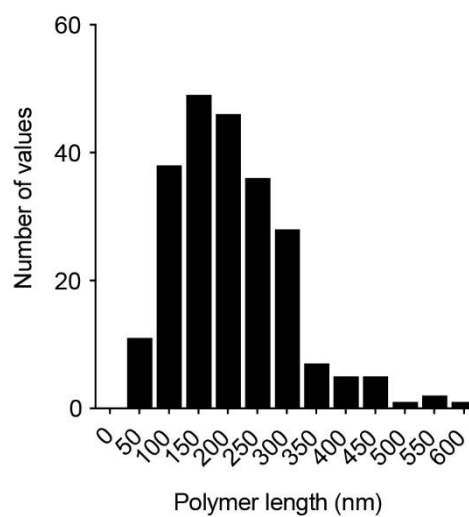

**Figure S1. AFM analysis of PIC length.** (a) Representative AFM image showing PIC polymers on a mica surface, scale bar is 200 nm. (b) Histogram of PIC length distribution after analysis of 229 polymers. Mean polymer length is 205 nm.

Table S1: Overview of all formulations used in this study

| Figure | Bead type       | PIC (ng/10 <sup>6</sup> beads) | Total antibody (ng/10 <sup>6</sup> beads) | αCD28/αCD3 ratio | Average # antibody per PIC | Average spacing PIC (nm) | Average spacing antibodies (nm) |
|--------|-----------------|--------------------------------|-------------------------------------------|------------------|----------------------------|--------------------------|---------------------------------|
| 1b,c,d | Ab beads        |                                | 14.5                                      | 3.60             |                            |                          | 33.1                            |
| 1b,d,c | PIC beads       | 3.65 <sup>(1)</sup>            | 12.2                                      | 4.20             | 16.8 <sup>(2)</sup>        | 148                      | 36.1                            |
| 1e,f   | Flat PIC        | 56                             |                                           |                  | 12.4                       | 37.8                     | 10.7                            |
| 1e,f   | Crosslinked PIC | 591                            |                                           |                  | 16.8 <sup>(3)</sup>        | 11.6 <sup>(3)</sup>      | 2.84                            |
| 1e,f   | PIC beads       | 15                             |                                           |                  | 16.8 <sup>(1)</sup>        | 73.0                     | 17.8                            |
| S2     | PIC beads       | 15.5                           | 51.6                                      | 4.76             | 16.8 <sup>(1)</sup>        | 71.8                     | 17.5                            |
| 2a,b   | Ab beads        |                                | 35.6                                      | 0.54             |                            |                          | 21.1                            |
| 2a,b   | Ab beads        |                                | 38.8                                      | 0.98             |                            |                          | 20.2                            |
| 2a,b   | Ab beads        |                                | 44.6                                      | 2.0              |                            |                          | 18.8                            |
| 2a,b   | Ab beads        |                                | 37.4                                      | 5.0              |                            |                          | 20.6                            |
| 2a,b   | PIC beads       | 3.74                           | 9.78                                      | 0.39             | 13.2                       | 146                      | 40.2                            |
| 2a,b   | PIC beads       | 4.41                           | 11.7                                      | 0.46             | 13.3                       | 135                      | 36.9                            |
| 2a,b   | PIC beads       | 4.91                           | 12.9                                      | 0.75             | 13.2                       | 128                      | 35.0                            |
| 2a,b   | PIC beads       | 4.77                           | 12.7                                      | 1.4              | 13.4                       | 129                      | 35.3                            |
| 2a,b   | PIC beads       | 4.29                           | 11.5                                      | 4.0              | 13.5                       | 136                      | 37.1                            |
| 2c-h   | Ab beads        |                                | 67.5                                      | 4.39             |                            |                          | 15.3                            |
| 2c-h   | Ab beads        |                                | 60.4                                      | 3.48             |                            |                          | 16.2                            |
| 2c-h   | Ab beads        |                                | 43.4                                      | 3.17             |                            |                          | 19.1                            |
| 2c-h   | Ab beads        |                                | 22.5                                      | 3.43             |                            |                          | 26.5                            |
| 2c-h   | Ab beads        |                                | 14.5                                      | 3.60             |                            |                          | 33.1                            |
| 2c-h   | Ab beads        |                                | 5.56                                      | 3.44             |                            |                          | 53.4                            |
| 2c-h   | Ab beads        |                                | 2.38                                      | 2.82             |                            |                          | 81.6                            |
| 2c-h   | Ab beads        |                                | 1.06                                      | 4.23             |                            |                          | 122.5                           |
| 2c-h   | PIC beads       | 15.9 <sup>(1)</sup>            | 53.0                                      | 4.81             | 16.8 <sup>(2)</sup>        | 70.9                     | 17.3                            |
| 2c-h   | PIC beads       | 15.5 <sup>(1)</sup>            | 51.6                                      | 4.76             | 16.8 <sup>(2)</sup>        | 71.8                     | 17.5                            |
| 2c-h   | PIC beads       | 11.4 <sup>(1)</sup>            | 38.0                                      | 4.66             | 16.8 <sup>(2)</sup>        | 83.7                     | 20.4                            |
| 2c-h   | PIC beads       | 3.65 <sup>(1)</sup>            | 12.2                                      | 4.20             | 16.8 <sup>(2)</sup>        | 148                      | 36.1                            |
| 2c-h   | PIC beads       | 2.26 <sup>(1)</sup>            | 7.53                                      | 3.69             | 16.8 <sup>(2)</sup>        | 188                      | 45.9                            |
| 2c-h   | PIC beads       | 1.06 <sup>(1)</sup>            | 3.52                                      | 3.64             | 16.8 <sup>(2)</sup>        | 275                      | 67.1                            |
| 2c-h   | PIC beads       | 0.36 <sup>(1)</sup>            | 1.20                                      | 4.31             | 16.8 <sup>(2)</sup>        | 471                      | 114.9                           |
| 2c-h   | PIC beads       | 0.21 <sup>(1)</sup>            | 0.70                                      | 3.82             | 16.8 <sup>(2)</sup>        | 617                      | 150.3                           |
| 3/4    | PIC beads       | 2.5 <sup>(1)</sup>             | 13.1                                      | 10               | 32.1                       | 179.7                    | 34.8                            |

(1): These values are based on the antibody per polymer values found after purification of the polymer.

(2): This value is not determined by stripping assay but based on analysis after polymer purification and assumed similar for all samples that use this polymer.

(3): This value is assumed similar as the value of the corresponding PIC beads used in the same figure because the same polymer was used.

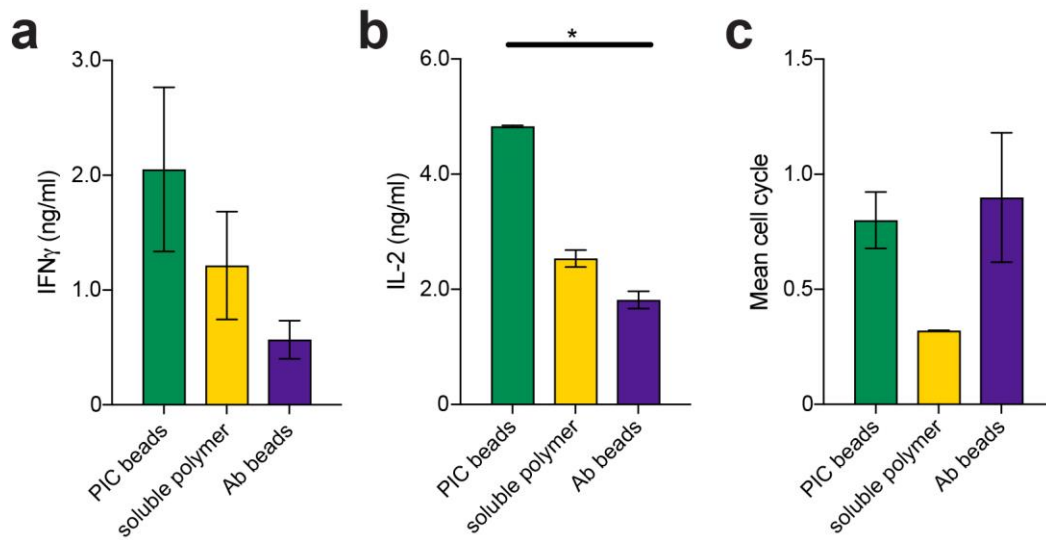

**Figure S2. Comparison with soluble PIC.** (a) IFN $\gamma$  and (b) IL-2 concentration in the supernatant of T cells stimulated with PIC beads, soluble PIC or Ab beads with conjugated  $\alpha$ CD28/  $\alpha$ CD3 after 24h of culture. (c) Mean cell cycle of proliferated human T cells after 3 days of stimulation with  $\alpha$ CD28/  $\alpha$ CD3 modified PIC beads, soluble PIC or Ab beads. n=2 in 1 independent experiment for all conditions. (a-c) Data was analyzed using a RM one-way ANOVA with Geisser-Greenhouse correction, followed by Dunnett's multiple comparison test on log<sub>2</sub> transformed data.

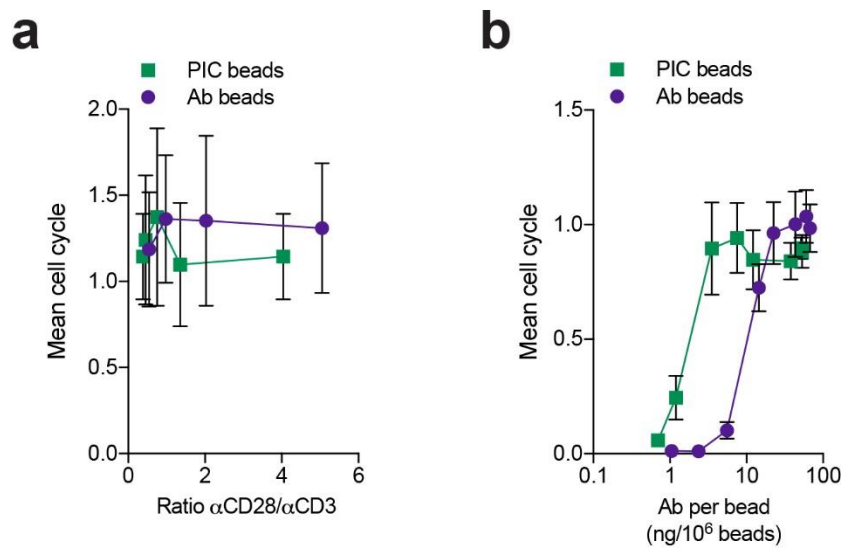

**Figure S3. Influence of  $\alpha$ CD28/  $\alpha$ CD3 ratio and density on proliferation.** (a) Mean cell cycle of proliferated T cells stimulated with Ab or PIC beads with different  $\alpha$ CD28/  $\alpha$ CD3 ratios after 3 days of culture n=3 in 2 independent experiments. (b) Mean cell cycle of proliferated T cells stimulated with Ab or PIC beads with different antibody densities after 3 days of culture n=4 in 2 independent experiments.

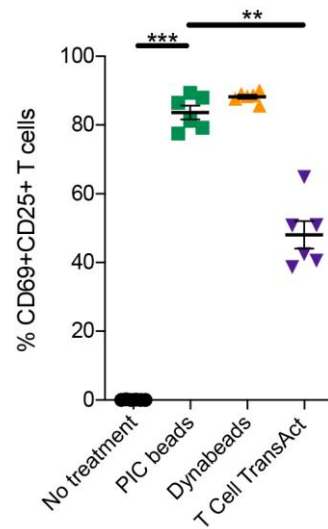

**Figure S4. CD69 and CD25 expression of stimulated T cells.** Percentage of CD69<sup>+</sup>CD25<sup>+</sup> T cells after 1 day of stimulation with PIC beads, Dynabeads, T Cell TransAct or no treatment n=6 in 3 independent experiments. Significance was analyzed using a RM one-way ANOVA with Geisser-Greenhouse correction followed by a Dunnett's multiple comparison test on log<sub>2</sub> transformed data.

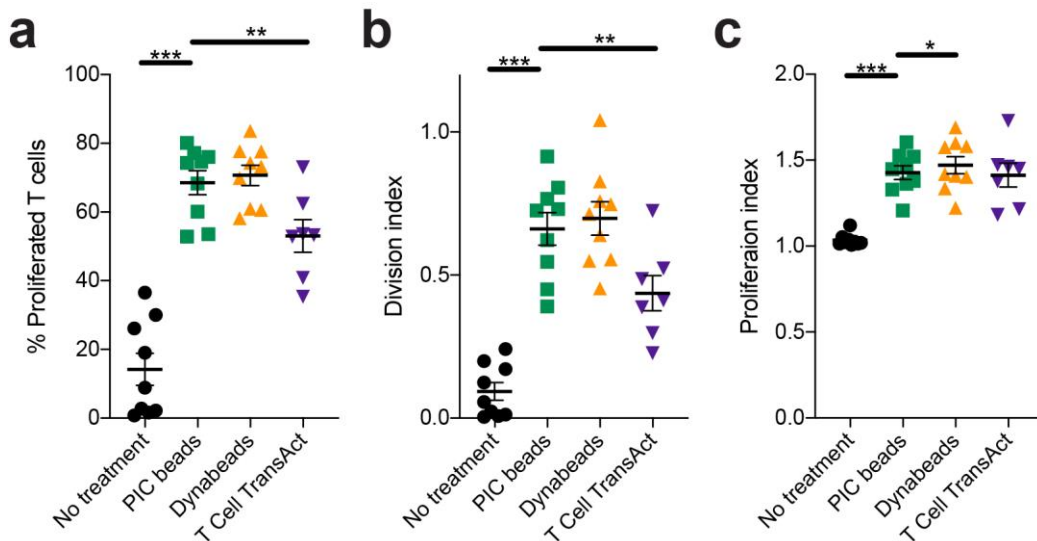

**Figure S5. Proliferation of expanded T cells.** (a) Percentage of viable T cells after expansion with PIC beads, Dynabeads, T Cell TransAct. (b) Calculated division index, defined as the average number of division cycles of all (both proliferating and non-proliferating) T cells. (c) Calculated proliferation index, defined as the average number of division cycles of only the proliferating T cells. (a-c) n=7 for T cell Transact in 3 independent experiments, n=9 for all other conditions in 4 independent experiments. Data was analyzed using a mixed-effects analysis with the Geisser-Greenhouse correction, followed by Dunnett's multiple comparisons test on log<sub>2</sub> transformed data.

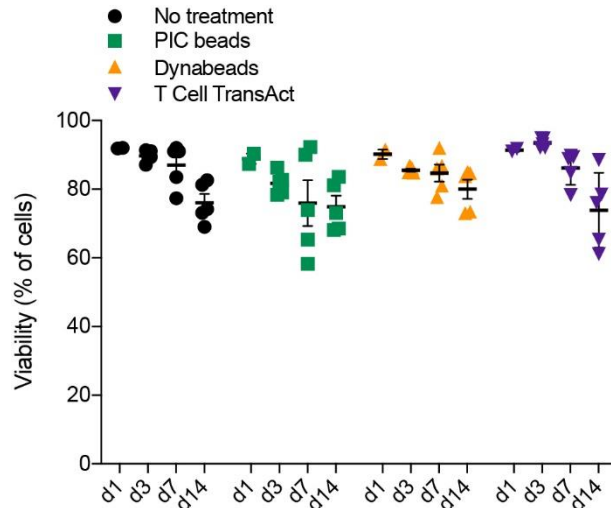

**Figure S6. Viability of expanded T cells.** Percentage of viable T cells after expansion with PIC beads, Dynabeads, T Cell TransAct. d1 n=2 in 1 independent experiment, all other days n=5 in 2 independent experiments.

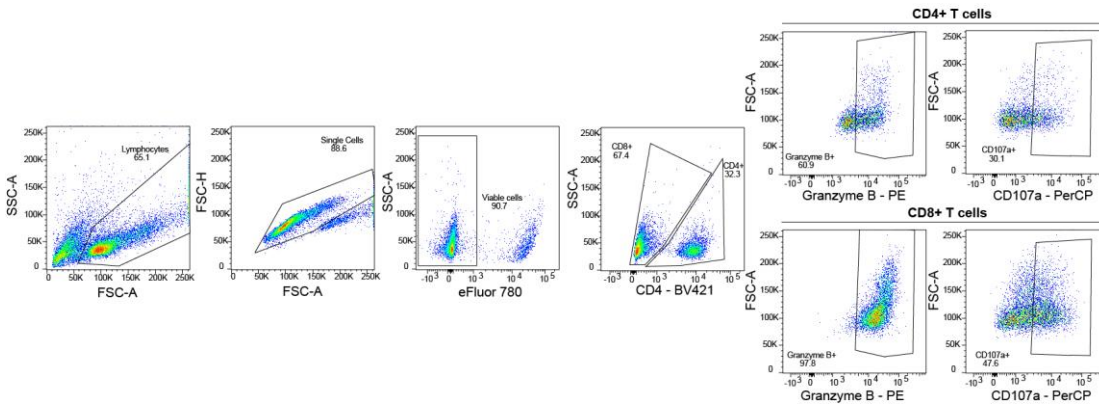

**Figure S7. Gating strategy to determine T cell differentiation on day 14, based on FMO controls.**

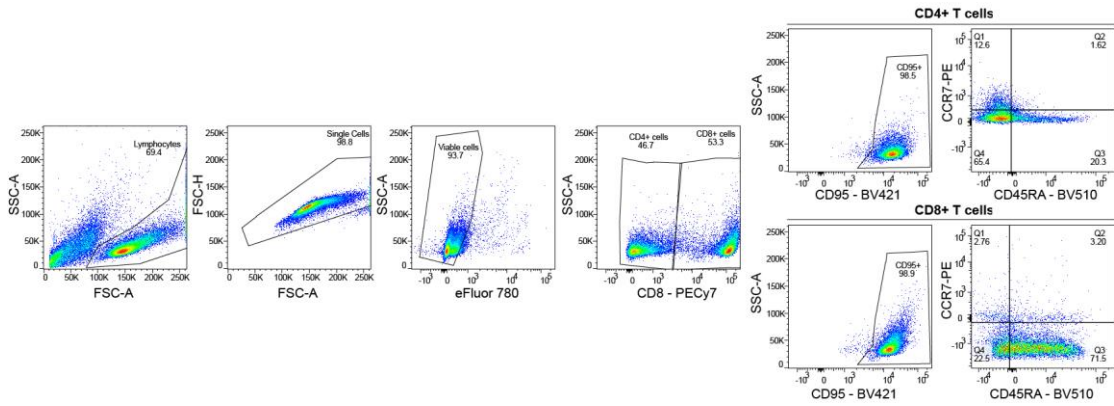

**Figure S8.** Gating strategy to determine the T cell cytotoxicity on day 14, based on FMO controls.

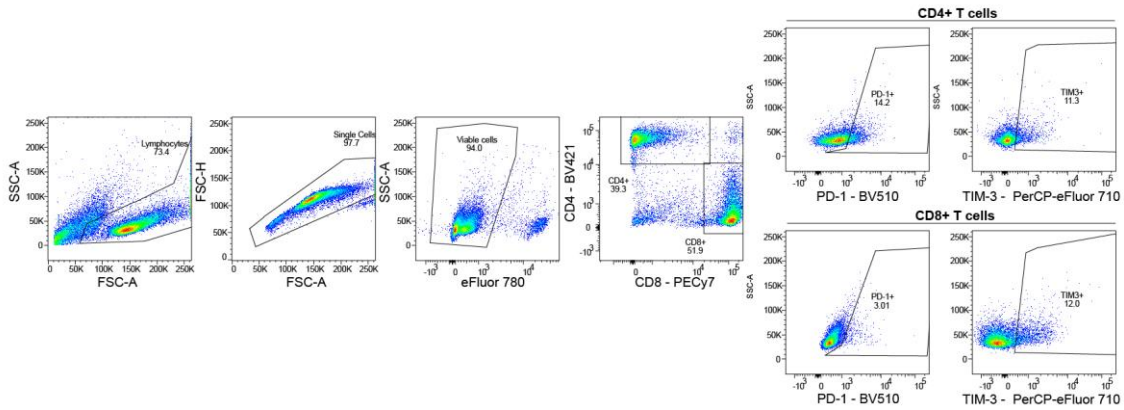

**Figure S9.** Gating strategy for to determine T cell exhaustion on day 14, based on FMO controls.

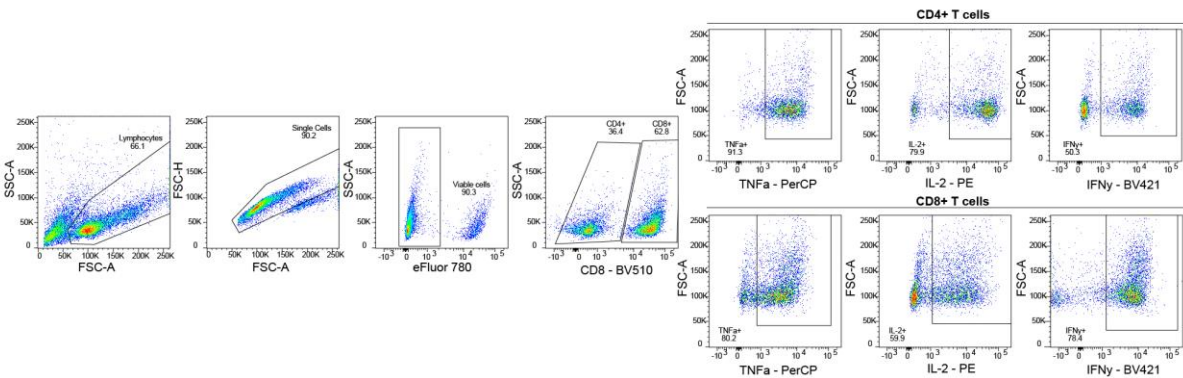

**Figure S10.** Gating strategy to determine the intracellular cytokine production of T cells on day 14, based on FMO controls.



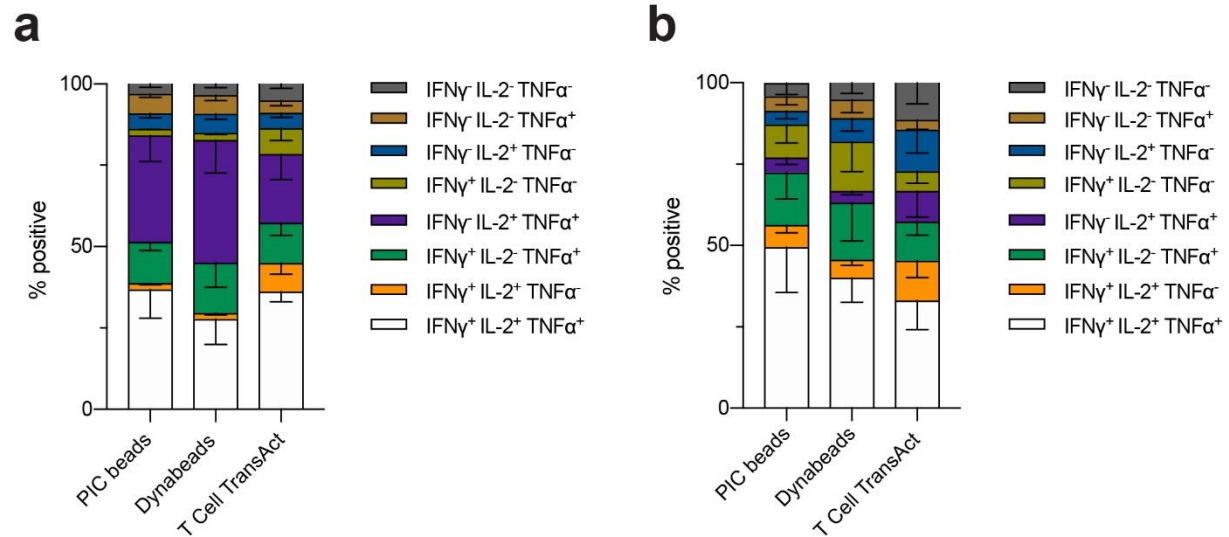

**Figure S11. Detailed overview of intracellular cytokine production.** (a) Intracellular cytokine staining for CD4<sup>+</sup> T cells. (b) Intracellular cytokine staining for CD8<sup>+</sup> T cells. n=5 in 2 independent experiments.
